# Supplementary material for: Community carriage of ESBL-producing Escherichia coli and Klebsiella pneumoniae: a cross-sectional study of risk factors and comparative genomics of carriage and clinical isolates
Source: PubMed Central journal article supplement (PMC10470604; doi:10.1128/msphere.00025-23), 2023-06-12
Supplement: msphere.00025-23-s0004.pdf [file msphere.00025-23-s0004.pdf]

Legend

- ▶ exposure
- ◐ unobserved (latent)
- ◉ ancestor of exposure and outcome
- ◑ outcome
- adjusted variable
- causal path

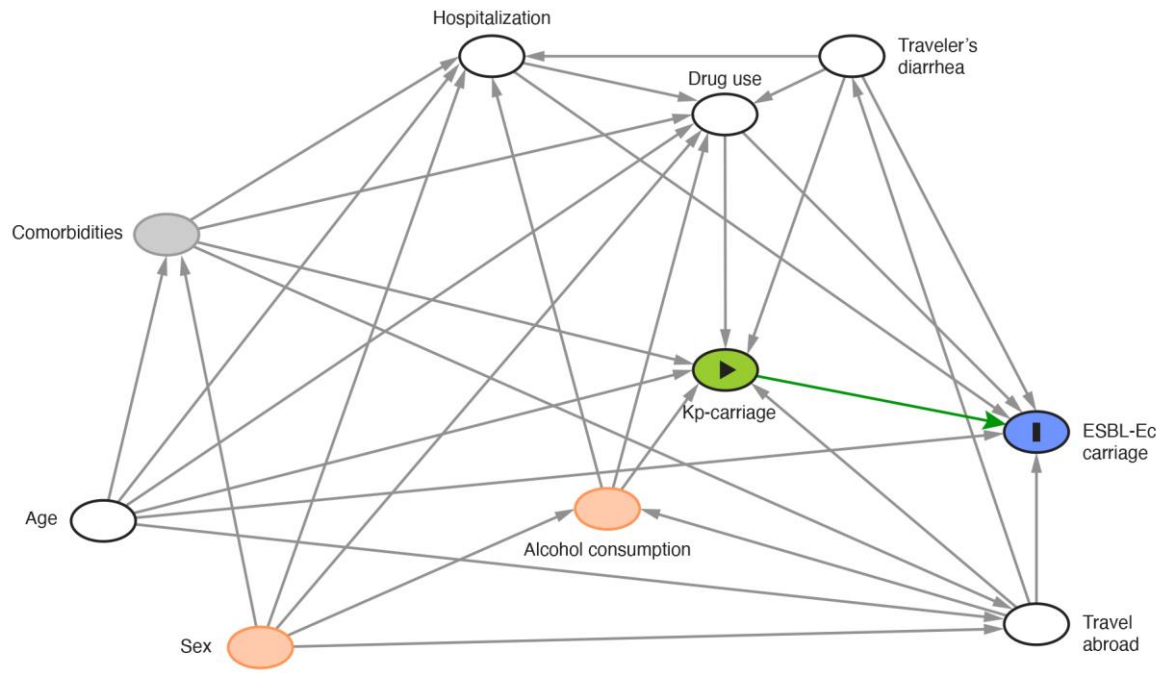

**Supplementary Figure 4**
