# Supplementary material for: Community carriage of ESBL-producing Escherichia coli and Klebsiella pneumoniae: a cross-sectional study of risk factors and comparative genomics of carriage and clinical isolates
Source: PubMed Central journal article supplement (PMC10470604; doi:10.1128/msphere.00025-23), 2023-06-12
Supplement: msphere.00025-23-s0005.pdf [file msphere.00025-23-s0005.pdf]

**Supplementary Table 1.** Characteristics of the Study population (n = 4,999) in Tromsø7, 2015-2016.

| Characteristics                                 | Study population |      |
|-------------------------------------------------|------------------|------|
|                                                 | N                | %    |
| Sex                                             |                  |      |
| Men                                             | 2,296            | 45.9 |
| Women                                           | 2,703            | 54.1 |
| Age (years)                                     |                  |      |
| 40-49                                           | 605              | 12.1 |
| 50-59                                           | 814              | 16.3 |
| 60-69                                           | 2,128            | 42.6 |
| 70-84                                           | 1,452            | 29.0 |
| Household income                                |                  |      |
| Low                                             | 2,015            | 42.7 |
| High <sup>a</sup>                               | 2,699            | 57.3 |
| Current daily smoking                           |                  |      |
| No                                              | 4,360            | 88.0 |
| Yes                                             | 595              | 12.0 |
| Alcohol consumption frequency                   |                  |      |
| Never to ≤monthly                               | 1,624            | 32.7 |
| 2-4/month                                       | 1,820            | 36.6 |
| 2-3/week or more                                | 1,527            | 30.7 |
| Hospitalization past 12 months                  |                  |      |
| No                                              | 4,344            | 88.0 |
| Yes                                             | 593              | 12.0 |
| Antibiotic use past 14 days <sup>b</sup>        |                  |      |
| No                                              | 4,832            | 96.9 |
| Yes                                             | 155              | 3.1  |
| Acid suppressive medication last 4 weeks        |                  |      |
| No                                              | 3,762            | 79.7 |
| ≤weekly                                         | 403              | 8.5  |
| Every week, but not daily                       | 260              | 5.5  |
| Daily                                           | 297              | 6.3  |
| Travel abroad past 12 months <sup>c</sup>       |                  |      |
| No                                              | 2,145            | 44.5 |
| Other regions (excl. Asia)                      | 2,214            | 45.9 |
| Asia exclusively or Asia + other regions        | 462              | 9.6  |
| Traveler`s diarrhea past 12 months <sup>d</sup> |                  |      |
| No                                              | 4,724            | 96.6 |
| Yes                                             | 166              | 3.4  |

<sup>a</sup> ≥551 000 NOK (€ 53 976/year as per June 2022)

<sup>b</sup> Have you taken any antibiotics (tablets or oral suspensions, nasal ointments, eye drops, or eye ointment) during the past 14 days?

<sup>c</sup> Traveled outside the Nordic countries >1 week duration in the past 12 months.

<sup>d</sup> For each travel abroad past 12 months, the participants were asked if they did experience diarrhea in connection with the travel.
