# Supplementary material for: Community carriage of ESBL-producing Escherichia coli and Klebsiella pneumoniae: a cross-sectional study of risk factors and comparative genomics of carriage and clinical isolates
Source: PubMed Central journal article supplement (PMC10470604; doi:10.1128/msphere.00025-23), 2023-06-12
Supplement: msphere.00025-23-s0006.pdf [file msphere.00025-23-s0006.pdf]

**Supplementary Table 2.** Association between ESBL-producing *E. coli* and *K. pneumoniae* species complex (SC) gastrointestinal carriage among 2,973 participants in Tromsø7.

| Characteristics                                   | %<br>(ESBL-<br><i>E. coli</i> ) | n<br>(ESBL-<br><i>E. coli</i> ) | N     | AOR  | 95% CI    | p-value |
|---------------------------------------------------|---------------------------------|---------------------------------|-------|------|-----------|---------|
| Age (years)                                       |                                 |                                 |       |      |           | 0.123   |
| 40-49                                             | 2.3                             | 8                               | 344   | 1.00 |           |         |
| 50-59                                             | 4.4                             | 19                              | 434   | 1.86 | 0.80-4.34 |         |
| 60-69                                             | 3.0                             | 38                              | 1,286 | 1.02 | 0.47-2.25 |         |
| 70-84                                             | 2.8                             | 25                              | 909   | 0.90 | 0.39-2.10 |         |
| Hospitalization past 12 months                    |                                 |                                 |       |      |           | 0.056   |
| No                                                | 2.9                             | 75                              | 2,587 | 1.00 |           |         |
| Yes                                               | 4.3                             | 15                              | 352   | 1.78 | 0.99-3.20 |         |
| Antibiotic use past 14 days <sup>a</sup>          |                                 |                                 |       |      |           | 0.553   |
| No                                                | 3.0                             | 85                              | 2,862 | 1.00 |           |         |
| Yes                                               | 4.9                             | 5                               | 103   | 1.37 | 0.48-3.90 |         |
| Acid suppressive medication past 4weeks           |                                 |                                 |       |      |           | 0.335   |
| Not used                                          | 2.7                             | 61                              | 2,219 | 1.00 |           |         |
| ≤week                                             | 3.2                             | 8                               | 252   | 1.16 | 0.54-2.48 |         |
| Every week, but not daily                         | 4.1                             | 6                               | 148   | 1.52 | 0.64-3.64 |         |
| Daily                                             | 5.1                             | 9                               | 176   | 1.89 | 0.90-3.97 |         |
| Travel abroad past 12 months <sup>b</sup>         |                                 |                                 |       |      |           | 0.003   |
| No                                                | 2.4                             | 31                              | 1,266 | 1.00 |           |         |
| Other regions (excl. Asia)                        | 2.8                             | 37                              | 1,319 | 1.24 | 0.74-2.05 |         |
| Asia exclusively + other regions                  | 7.0                             | 19                              | 272   | 2.96 | 1.56-5.60 |         |
| Traveler`s diarrhea past 12 months <sup>c</sup>   |                                 |                                 |       |      |           | 0.599   |
| No                                                | 3.1                             | 86                              | 2,805 | 1.00 |           |         |
| Yes                                               | 3.0                             | 3                               | 100   | 0.72 | 0.22-2.43 |         |
| <i>K. pneumoniae</i> SC gastrointestinal carriage |                                 |                                 |       |      |           | 0.059   |
| No                                                | 2.7                             | 67                              | 2,489 | 1.00 |           |         |
| Yes                                               | 4.8                             | 23                              | 484   | 1.65 | 0.98-2.77 |         |

ESBL, extended spectrum  $\beta$ -lactamase; N, denominator; AOR, adjusted odds ratio; CI, confidence interval  
AOR adjusted for age, hospitalization past 12 months, antibiotic use past 14 days, acid suppressive medication past 4 weeks, travel abroad past 12 months, traveler`s diarrhea past 12 months, and *K. pneumoniae* SC gastrointestinal carriage.

The multivariable model includes 2,651 participants with complete information on all variables.
