# Supplementary material for: Community carriage of ESBL-producing Escherichia coli and Klebsiella pneumoniae: a cross-sectional study of risk factors and comparative genomics of carriage and clinical isolates
Source: PubMed Central journal article supplement (PMC10470604; doi:10.1128/msphere.00025-23), 2023-06-12
Supplement: msphere.00025-23-s0008.pdf [file msphere.00025-23-s0008.pdf]

**Supplementary Table 4.** Comparison of ESBL-*E. coli* ST131 subclade prevalence between carriage isolates from Tromsø7 (n=166) and clinical isolates from NORM 2014 (n=118).

| ST131 subclade | Tromsø7 % (n) | NORM 2014 % (n) | OR   | 95%CI      | p-value |
|----------------|---------------|-----------------|------|------------|---------|
| A              | 6.0 (10)      | 13.6 (16)       | 2.45 | 1.07-5.60  | 0.034   |
| B              | 1.2 (2)       | 0.8 (1)         | 0.70 | 0.06-7.82  | 0.773   |
| B0             | 0.6 (1)       | 0.8 (1)         | 1.41 | 0.09-22.78 | 0.809   |
| C1             | 11.4 (19)     | 17.8 (21)       | 1.67 | 0.86-3.28  | 0.132   |
| C2             | 4.8 (8)       | 24.6 (29)       | 6.44 | 2.82-14.68 | <0.001  |

OR, odds ratio; CI, confidence interval
