# Supplementary material for: Community carriage of ESBL-producing Escherichia coli and Klebsiella pneumoniae: a cross-sectional study of risk factors and comparative genomics of carriage and clinical isolates
Source: PubMed Central journal article supplement (PMC10470604; doi:10.1128/msphere.00025-23), 2023-06-12
Supplement: msphere.00025-23-s0009.pdf [file msphere.00025-23-s0009.pdf]

**Supplementary Table 5.** SNP distances among two putative ESBL-producing *E. coli* clusters identified using a  $\leq 17$  SNP cut-off.

| Cluster | SNP distance | Sample ID | Collection | Sample material | ST    | ST131 subclade |
|---------|--------------|-----------|------------|-----------------|-------|----------------|
| 1       | 4            | T7-498    | Tromsø7    | Feces           | ST131 | C1             |
|         |              | T7-602    | Tromsø7    | Feces           |       |                |
| 2       | 6-9          | T7-530    | Tromsø7    | Feces           | ST357 | -              |
|         |              | T7-549    |            |                 |       |                |
|         |              | T7-628    | Tromsø7    | Feces           |       |                |

SNP, single nucleotide polymorphism
