# Supplementary material for: Community carriage of ESBL-producing Escherichia coli and Klebsiella pneumoniae: a cross-sectional study of risk factors and comparative genomics of carriage and clinical isolates
Source: PubMed Central journal article supplement (PMC10470604; doi:10.1128/msphere.00025-23), 2023-06-12
Supplement: msphere.00025-23-s0010.pdf [file msphere.00025-23-s0010.pdf]

**Supplementary Table 6.** Susceptibility profile of carriage and clinical isolates of ESBL-*E. coli* ST131 and non-ST131.

|                                  | Carriage (Tromsø7) |      |       |                   |      |      | Clinical (NORM 2014) |      |       |                  |      |       |
|----------------------------------|--------------------|------|-------|-------------------|------|------|----------------------|------|-------|------------------|------|-------|
|                                  | ST131 (n=40)       |      |       | non-ST131 (n=126) |      |      | ST131 (n=68)         |      |       | non-ST131 (n=50) |      |       |
|                                  | %S                 | %I   | %R    | %S                | %I   | %R   | %S                   | %I   | %R    | %S               | %I   | %R    |
| Amoxicillin-clavulanic acid i.v. | 57.5               | -    | 42.5  | 57.1              | -    | 42.9 | 30.9                 | -    | 69.1  | 18.0             | -    | 82.0  |
| Amoxicillin-clavulanic acid*     | 90.0               | -    | 10.0  | 90.5              | -    | 9.5  | 54.4                 | -    | 45.6  | 54.0             | -    | 46.0  |
| Piperacillin-tazobactam          | 97.5               | -    | 2.5   | 97.6              | -    | 2.4  | 70.4†                | -    | 29.6† | 64.5†            | -    | 35.5† |
| Cefuroxime*                      | 0.0                | -    | 100.0 | 0.8               | -    | 99.2 | 0.0                  | -    | 100.0 | 4.0              | -    | 96.0  |
| Ceftazidime                      | 17.5               | 42.5 | 40.0  | 21.4              | 29.4 | 49.2 | 13.2                 | 11.8 | 75.0  | 6.0              | 10.0 | 84.0  |
| Cefotaxime                       | 0.0                | 2.5  | 97.5  | 0.0               | 2.4  | 97.6 | 0.0                  | 0.0  | 100.0 | 2.0              | 2.0  | 96.0  |
| Cefepime                         | 10.0               | 60.0 | 30.0  | 7.1               | 53.2 | 39.7 | 1.9                  | 7.4  | 90.7  | 9.7              | 3.2  | 87.1  |
| Ceftazidime-avibactam            | 100.0              | -    | 0.0   | 100.0             | -    | 0.0  | -                    | -    | -     | -                | -    | -     |
| Ertapenem                        | 100.0              | -    | 0.0   | 100.0             | -    | 0.0  | -                    | -    | -     | -                | -    | -     |
| Meropenem                        | 100.0              | 0.0  | 0.0   | 100.0             | 0.0  | 0.0  | 100.0                | 0.0  | 0.0   | 98.0             | 2.0  | 0.0   |
| Aztreonam                        | 5.0                | 30.0 | 65.0  | 5.6               | 21.4 | 73.0 | -                    | -    | -     | -                | -    | -     |
| Amikacin                         | 100.0              | -    | 0.0   | 100.0             | -    | 0.0  | -                    | -    | -     | -                | -    | -     |
| Gentamicin                       | 70.0               | -    | 30.0  | 83.3              | -    | 16.7 | 48.5                 | -    | 51.5  | 48.0             | -    | 52.0  |
| Tobramycin                       | 65.0               | -    | 35.0  | 80.2              | -    | 19.8 | -                    | -    | -     | -                | -    | -     |
| Ciprofloxacin                    | 20.0               | 10.0 | 70.0  | 58.7              | 15.1 | 26.2 | 8.8                  | 11.8 | 79.4  | 22.0             | 4.0  | 74.0  |
| Trimethoprim-sulfamethoxazole    | 42.5               | 0.0  | 57.5  | 50.8              | 0.8  | 48.4 | 27.9                 | 0.0  | 72.1  | 26.0             | 0.0  | 74.0  |
| Nitrofurantoin                   | 97.5               | -    | 2.5   | 100.0             | -    | 0.0  | 100.0‡               | -    | 0.0‡  | 89.5‡            | -    | 10.5‡ |
| Fosfomycin                       | 100.0              | -    | 0.0   | 99.2              | -    | 0.8  | -                    | -    | -     | -                | -    | -     |
| Fosfomycin*                      | 97.5               | -    | 2.5   | 96.0              | -    | 4.0  | -                    | -    | -     | -                | -    | -     |
| Colistin                         | 100.0              | -    | 0.0   | 98.4              | -    | 1.6  | -                    | -    | -     | -                | -    | -     |
| Tigecycline                      | 100.0              | -    | 0.0   | 100.0             | -    | 0.0  | 100.0†               | -    | 0.0†  | 100.0†           | -    | 0.0†  |

S, susceptible; I, susceptible, increased exposure; R, resistant; i.v. intravenous; \*Breakpoints for uncomplicated urinary tract infections; †available for blood culture isolates only (n=85); ‡available for urine culture isolates only (n=33)
